# Supplementary material for: High Dimensional Imaging Mass Cytometry Panel to Visualize the Tumor Immune Microenvironment Contexture
Source: PubMed Central journal article supplement (PMC8085494; doi:10.3389/fimmu.2021.666233), 2021-04-16
Supplement: DataSheet_1.pdf [file DataSheet_1.pdf]

# High Dimensional Imaging Mass Cytometry Panel to Visualize the Tumor Immune Microenvironment Contexture

Elaldi R<sup>1,2</sup>, Hemon P<sup>3</sup>, Petti L<sup>1</sup>, Cosson E<sup>1</sup>, Desrues B<sup>4</sup>, Sudaka A<sup>5</sup>, Poissonnet G<sup>2</sup>, Van Obberghen-Schilling E<sup>4</sup>, Pers JO<sup>3</sup>, Braud VM<sup>1</sup>, Anjuere F<sup>1</sup> and Meghraoui-Kheddar A<sup>1\*</sup>

**Supplementary Table 1: IHC secondary antibodies**

| IHC secondary antibody                           | Provider         | References  |
|--------------------------------------------------|------------------|-------------|
| Peroxidase affinipure goat anti-mouse IgG (H+L)  | Jackson          | 115-036-003 |
| Peroxidase affinipure goat anti-rabbit IgG (H+L) | Jackson          | 111-035-003 |
| Peroxidase affinipure goat anti-rat IgG (H+L)    | Jackson          | 112-035-143 |
| Peroxidase affinipure rabbit anti-goat IgG (H+L) | Jackson          | 305-035-003 |
| Peroxidase goat anti-mouse IgM (H+L)             | Southern biotech | 1020-05     |

**Supplementary Table 2: metal conjugation reagents**

| Metal | Provider      | Reference  |
|-------|---------------|------------|
| 89Y   | Sigma-Aldrich | 204919-10G |
| 139La | Sigma-Aldrich | 203521-25G |
| 141Pr | Fluidigm      | 201141A    |
| 142Nd | Fluidigm      | 201143A    |
| 143Nd | Fluidigm      | 201145A    |
| 144Nd | Fluidigm      | 201148A    |
| 145Nd | Fluidigm      | 201151A    |
| 146Nd | Fluidigm      | 201153A    |
| 147Sm | Fluidigm      | 201154A    |
| 148Nd | Fluidigm      | 201158A    |
| 149Sm | Fluidigm      | 201160A    |
| 150Nd | Fluidigm      | 201163A    |
| 151Eu | Fluidigm      | 201164A    |
| 152Sm | Fluidigm      | 201166A    |
| 153Eu | Fluidigm      | 201167A    |
| 154Sm | Fluidigm      | 201168A    |
| 155Gd | Fluidigm      | 201169A    |
| 156Gd | Fluidigm      | 201171A    |
| 158Gd | Fluidigm      | 201172A    |
| 159Tb | Fluidigm      | 201173A    |
| 160Gd | Fluidigm      | 201175A    |
| 161Dy | Fluidigm      | 201176A    |
| 162Dy | Fluidigm      | 201194A    |
| 163Dy | Fluidigm      | 201198A    |

**Supplementary Table 3: Targets of the 39-markers IMC panel:**

| Target                   |              |                      |           | Metal             |           | IHC performance | IMC performance |
|--------------------------|--------------|----------------------|-----------|-------------------|-----------|-----------------|-----------------|
| Marker                   | Clone        | TiME cells/component | Abundance | Isotope           | Intensity |                 |                 |
| <b>β-Catenin</b>         | E247         | Epithelial - Tumor   | +++       | <sup>89</sup> Y   | +         | +++             | ++              |
| <b>Pan-cytokeratin</b>   | AE1-AE3      | Epithelial - Tumor   | ++/+++    | <sup>148</sup> Nd | ++        | +++             | +++             |
| <b>EGFR</b>              | D38B1        | Epithelial - Tumor   | ++        | <sup>142</sup> Nd | ++        | +++             | ++              |
| <b>Vimentin</b>          | EPR3776      | Fibroblasts          | +++       | <sup>139</sup> La | +         | +++             | ++              |
| <b>α-SMA</b>             | EPR5368      | Pericytes - CAF      | +++       | <sup>194</sup> Pt | +         | +++             | +++             |
| <b>Podoplanin</b>        | D2-40        | Lymphatic - tumor    | + / ++    | <sup>169</sup> Tm | +++       | +++             | +++             |
| <b>Tubulin-β-III</b>     | TUJ1         | Nerves               | ++        | <sup>141</sup> Pr | ++        | ++              | ++              |
| <b>Pan-neurofilament</b> | SMI-312      | Nerves               | + / ++    | <sup>160</sup> Gd | +++       | ++              | ++              |
| <b>NGFR</b>              | NGFR5        | Nerves               | +         | <sup>151</sup> Eu | +++       | ++              | +               |
| <b>Tenascin C</b>        | BC-24        | ECM                  | + / ++    | <sup>163</sup> Dy | +++       | +++             | +++             |
| <b>Fibronectin</b>       | F1           | ECM                  | + / ++    | <sup>168</sup> Er | +++       | +++             | +++             |
| <b>CD45</b>              | D9M8I        | Immune               | + / +++   | <sup>152</sup> Sm | +++       | +++             | +++             |
| <b>HLA-DR</b>            | YE2/36 HLK   | Immune               | +++       | <sup>174</sup> Yb | ++        | +++             | +++             |
| <b>CD16</b>              | EPR16784     | Immune               | ++        | <sup>146</sup> Nd | ++        | +++             | ++              |
| <b>CD14</b>              | EPR3653      | Mono-derived         | ++        | <sup>144</sup> Nd | ++        | +++             | ++              |
| <b>CD15</b>              | W6D3         | Neutrophils          | ++        | <sup>149</sup> Sm | ++        | +++             | ++              |
| <b>DC-SIGN</b>           | 102E11-06    | Dendritic            | +         | <sup>153</sup> Eu | +++       | ++              | ++              |
| <b>Langerin</b>          | 929F3-01     | Dendritic            | + / ++    | <sup>166</sup> Er | +++       | +++             | +++             |
| <b>DC-LAMP</b>           | 1010E1.01    | Dendritic            | ++        | <sup>176</sup> Yb | ++        | +++             | +++             |
| <b>CD11c</b>             | EP1347Y      | Phagocytes           | +         | <sup>154</sup> Sm | +++       | ++              | ++              |
| <b>CD163</b>             | EDHU-1       | Macrophages          | +         | <sup>147</sup> Sm | ++        | +++             | ++              |
| <b>CD68</b>              | KP1          | Macrophages          | + / +++   | <sup>159</sup> Tb | +++       | +++             | +++             |
| <b>CD206</b>             | POLY         | Macrophages          | +         | <sup>164</sup> Dy | +++       | +++             | +++             |
| <b>CD204</b>             | J5HTR3       | Macrophages          | ++        | <sup>171</sup> Yb | +++       | +++             | +++             |
| <b>FOXP3</b>             | 236A/E7      | T                    | +         | <sup>155</sup> Gd | +++       | ++              | ++              |
| <b>CD4</b>               | EPR6855      | T                    | +         | <sup>156</sup> Gd | +++       | +++             | ++              |
| <b>CD8</b>               | D8A8Y        | T                    | ++        | <sup>162</sup> Dy | +++       | +++             | +++             |
| <b>CD3</b>               | POLY         | T                    | +         | <sup>170</sup> Er | +++       | +++             | ++              |
| <b>CD20</b>              | H1 (FB1)     | B                    | +         | <sup>161</sup> Dy | +++       | +++             | ++              |
| <b>NKp46</b>             | 195314       | NK                   | +         | <sup>145</sup> Nd | ++        | ++              | +               |
| <b>CD56</b>              | 123A8        | NK                   | +         | <sup>158</sup> Gd | +++       | ++              | +               |
| <b>PD-L1</b>             | E1L3N        | Function             | +         | <sup>150</sup> Nd | +++       | ++              | +               |
| <b>PD-1</b>              | EPR4877(2)   | Function             | +         | <sup>165</sup> Ho | +++       | ++              | +               |
| <b>TIM-3</b>             | D5D5R        | Function             | +         | <sup>167</sup> Er | +++       | ++              | ++              |
| <b>TIGIT</b>             | BLR047F      | Function             | +         | <sup>172</sup> Yb | +++       | ++              | +               |
| <b>Myeloperoxidase</b>   | POLY         | Function             | +++       | <sup>173</sup> Yb | ++        | +++             | +++             |
| <b>Granzyme B</b>        | EPR20129-217 | Function             | +++       | <sup>175</sup> Lu | ++        | +++             | +++             |
| <b>Ki67</b>              | 8D5          | Function             | +++       | <sup>143</sup> Nd | ++        | +++             | +++             |
| <b>Active-Caspase-3</b>  | C92-605      | Function             | +++       | <sup>198</sup> Pt | +         | +++             | +               |

Classification of the antibodies included in the IMC panel based on the abundance of the targeted marker and intensity of the conjugated isotope (+: low, ++: mid, +++: high) and their staining performance in IHC and IMC (+: satisfactory, ++: good, +++: very good).

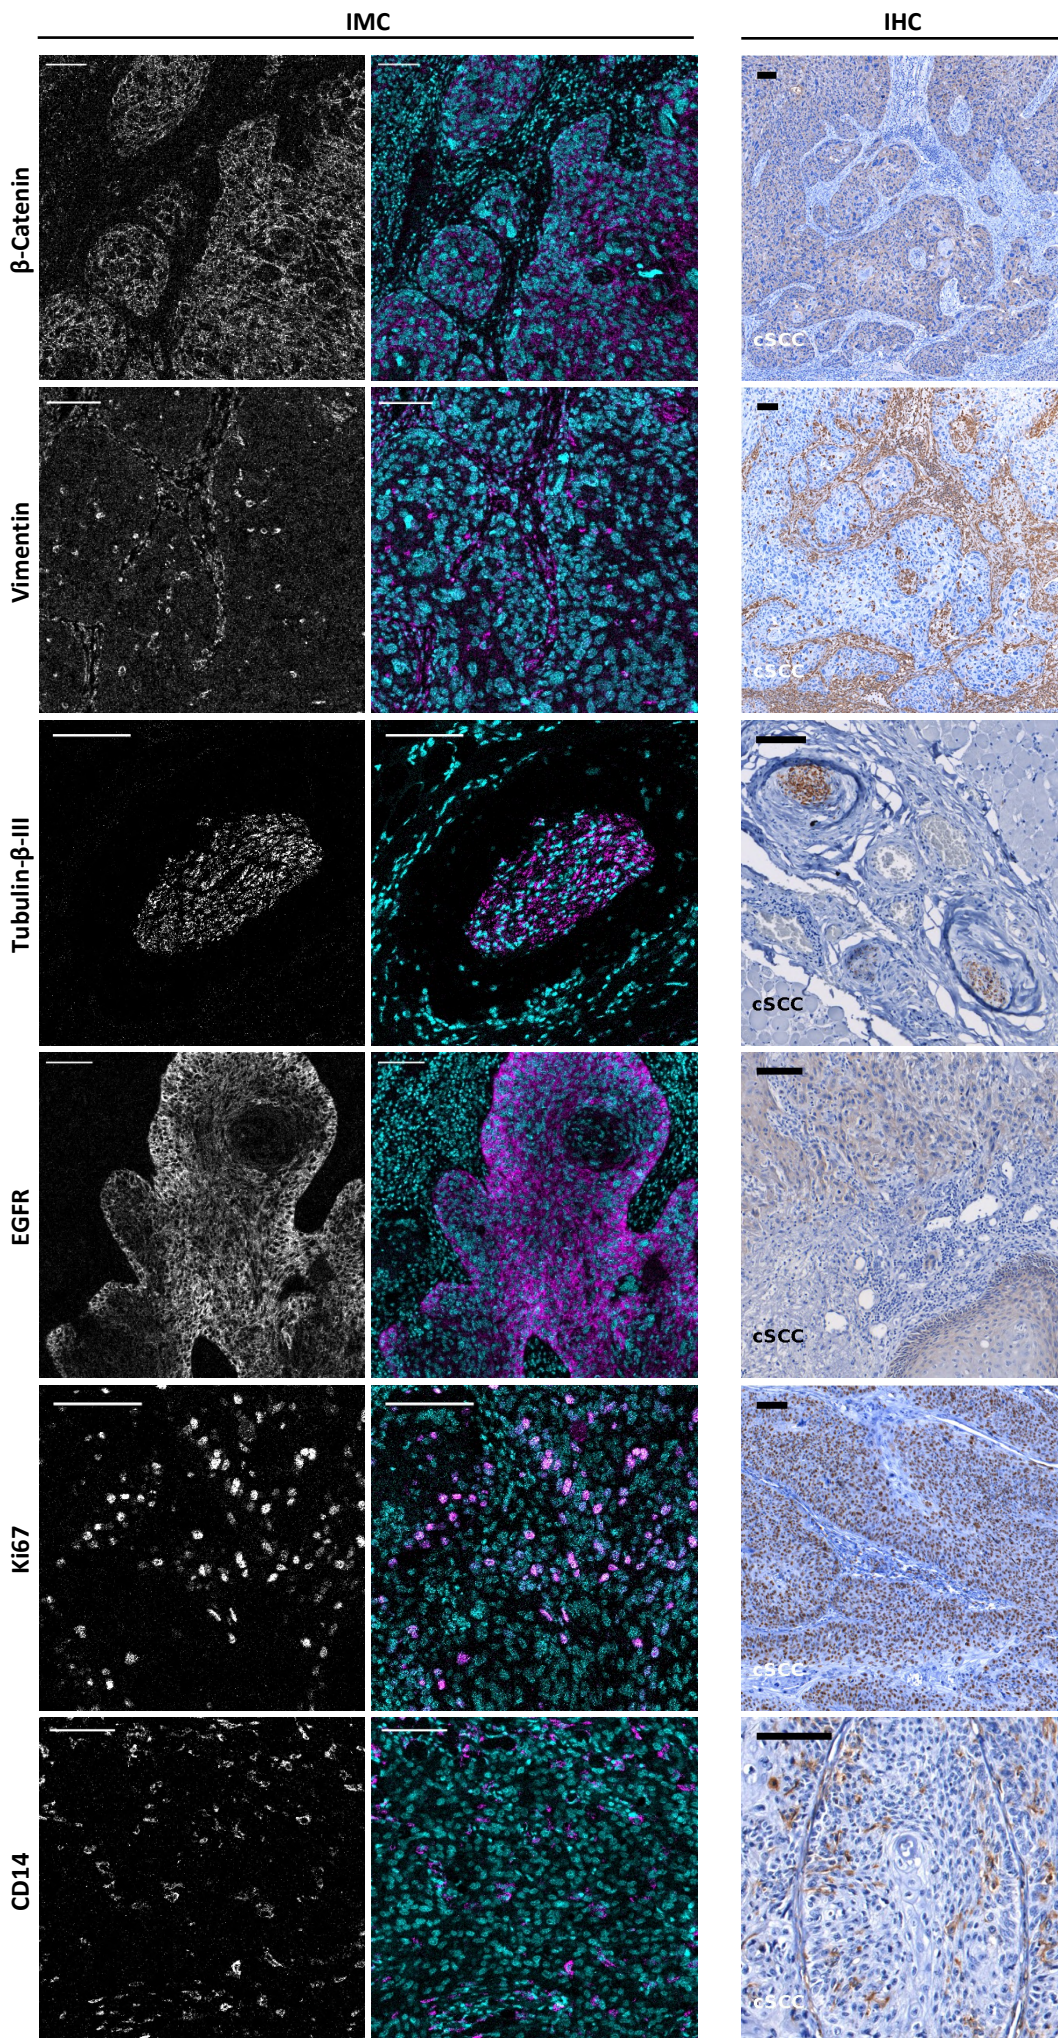

**Supplementary Figure 1-A :** Staining validation of the 39 antibodies used for IMC on cSCC sections and IHC on cSCC or tonsil sections. Single IMC antibody signal (left panels). IMC antibody (magenta) and nuclei (cyan) overlaid signals (middle panels). IHC antibody immunostaining (right panels). Scale bar = 100  $\mu$ m.

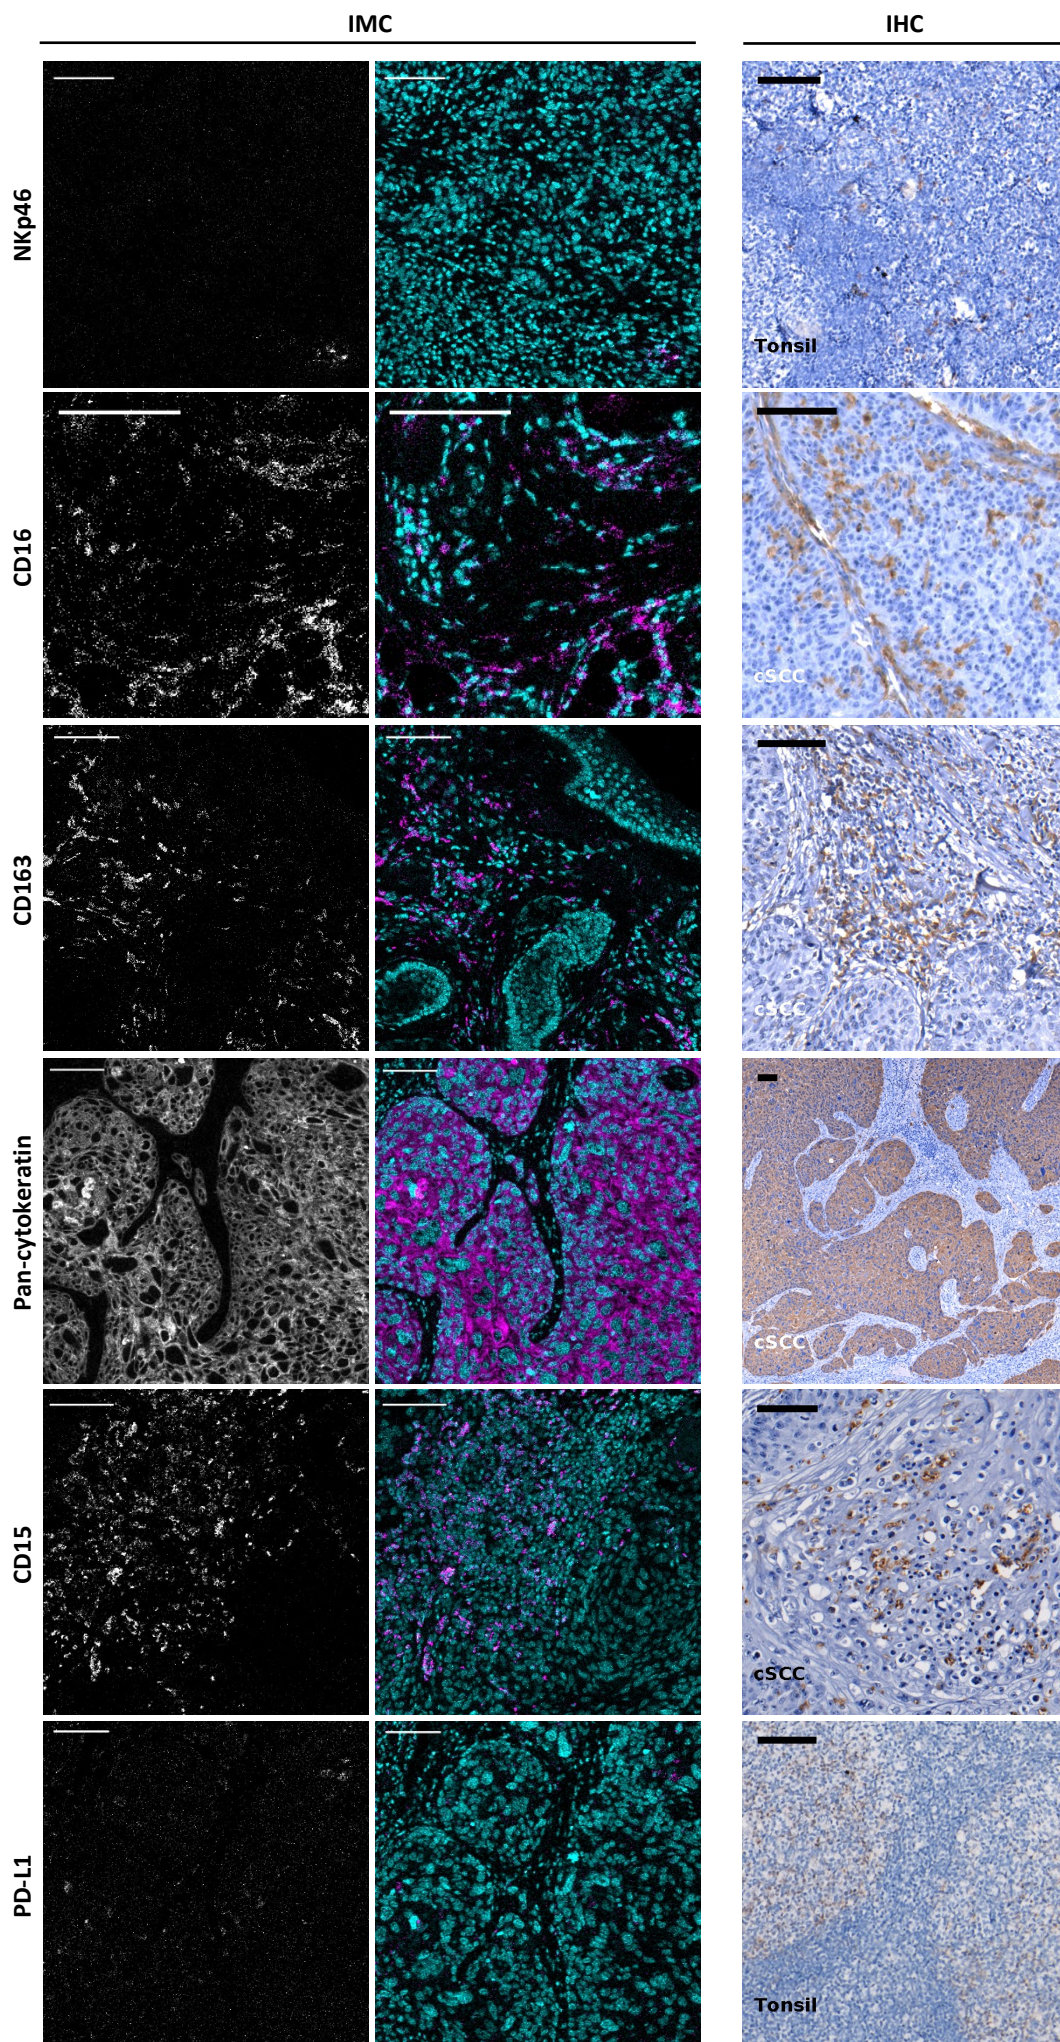

**Supplementary Figure 1-B** : Staining validation of the 39 antibodies used for IMC on cSCC sections and IHC on cSCC or tonsil sections. Single IMC antibody signal (left panels). IMC antibody (magenta) and nuclei (cyan) overlaid signals (middle panels). IHC antibody immunostaining (right panels). Scale bar = 100  $\mu$ m.

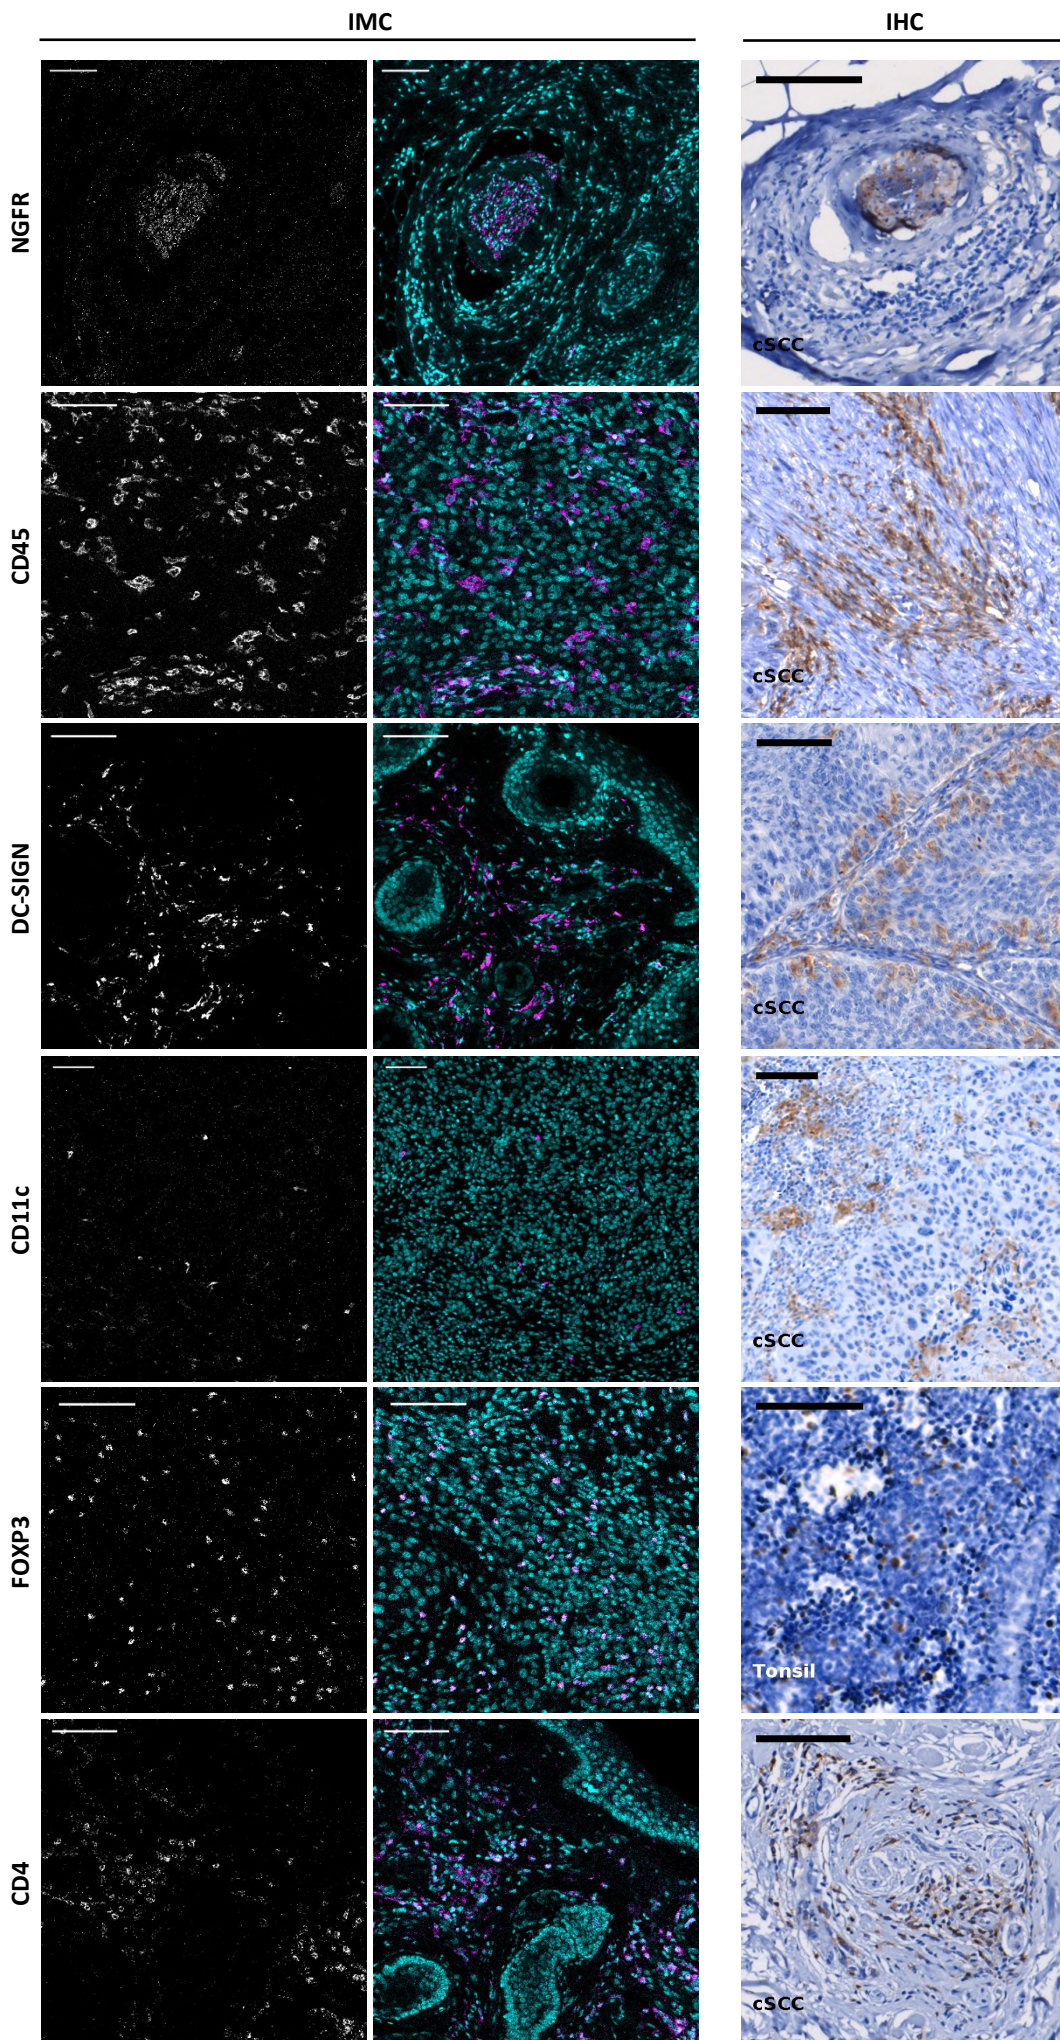

**Supplementary Figure 1-C :** Staining validation of the 39 antibodies used for IMC on cSCC sections and IHC on cSCC or tonsil sections. Single IMC antibody signal (left panels). IMC antibody (magenta) and nuclei (cyan) overlaid signals (middle panels). IHC antibody immunostaining (right panels). Scale bar = 100  $\mu$ m.

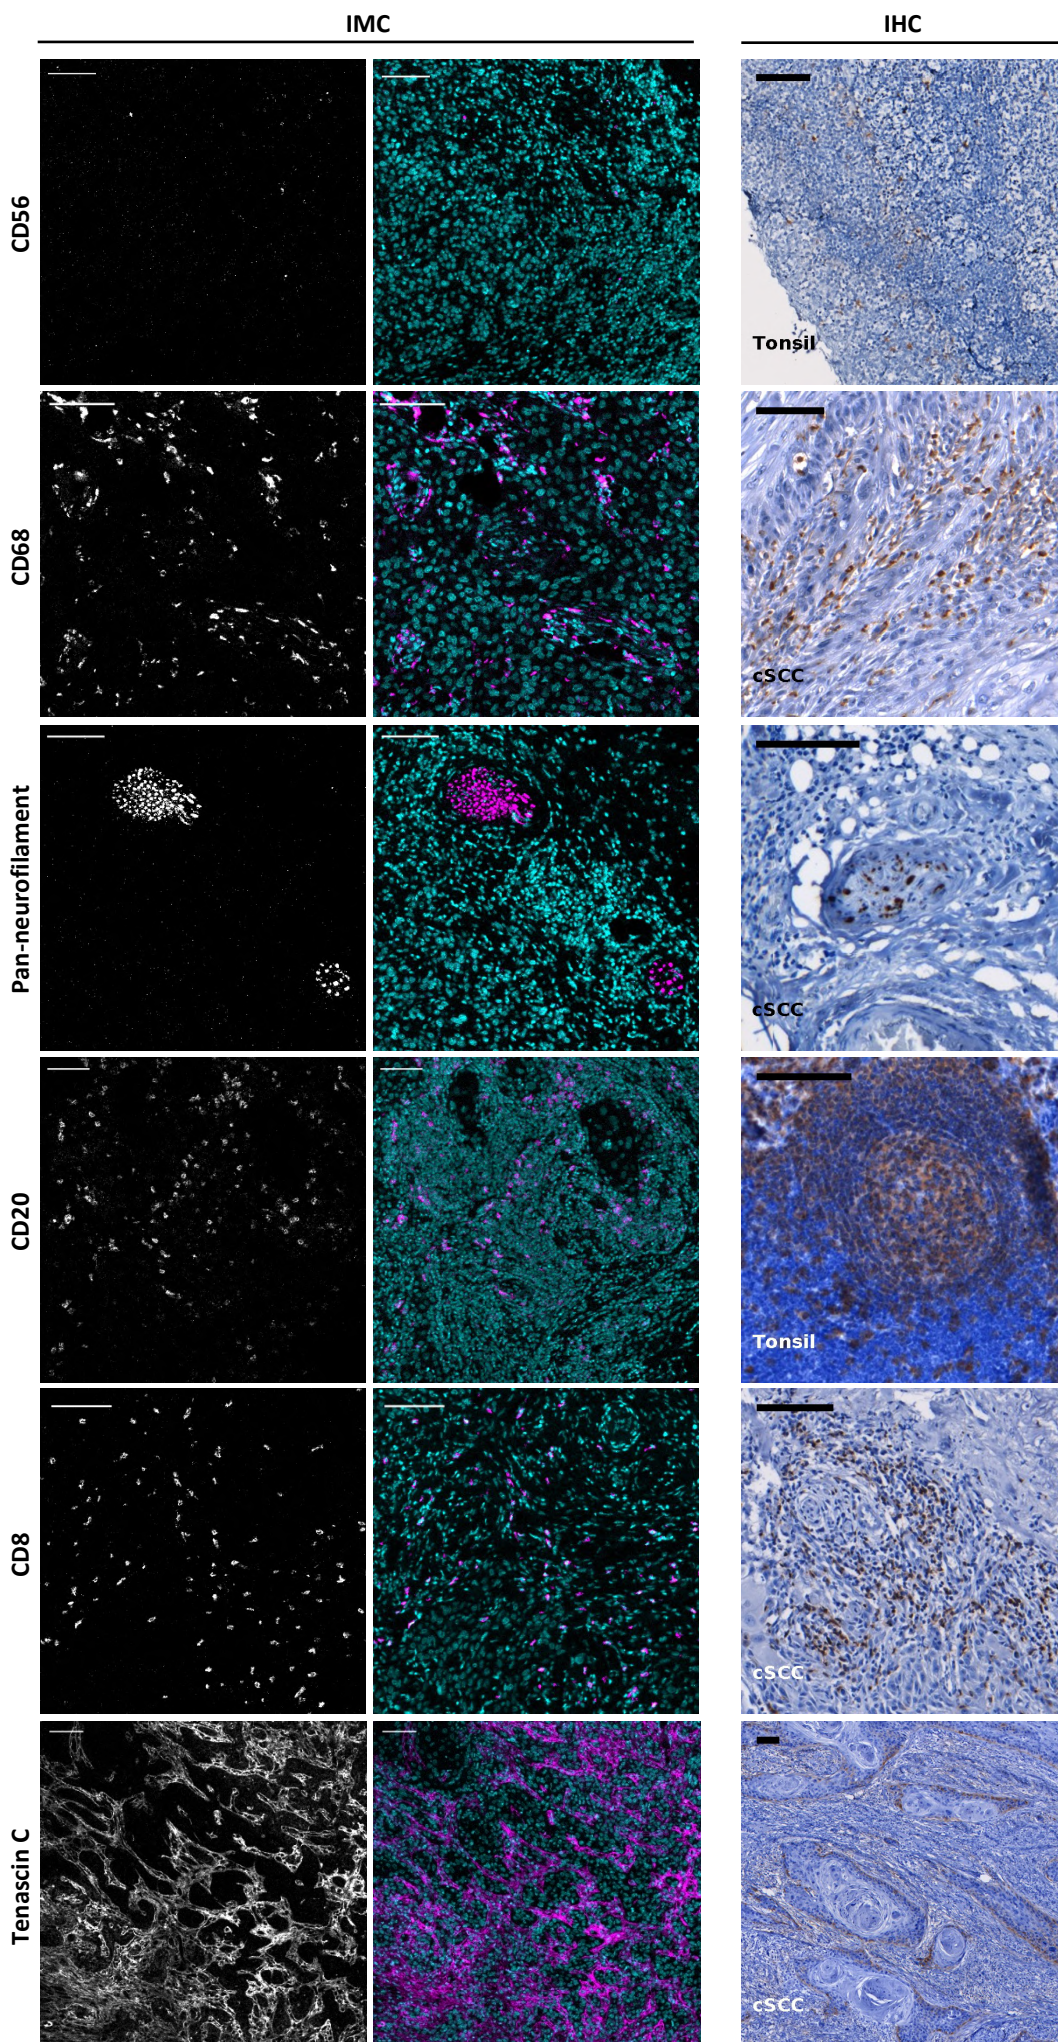

**Supplementary Figure 1-D** : Staining validation of the 39 antibodies used for IMC on cSCC sections and IHC on cSCC or tonsil sections. Single IMC antibody signal (left panels). IMC antibody (magenta) and nuclei (cyan) overlaid signals (middle panels). IHC antibody immunostaining (right panels). Scale bar = 100  $\mu$ m.

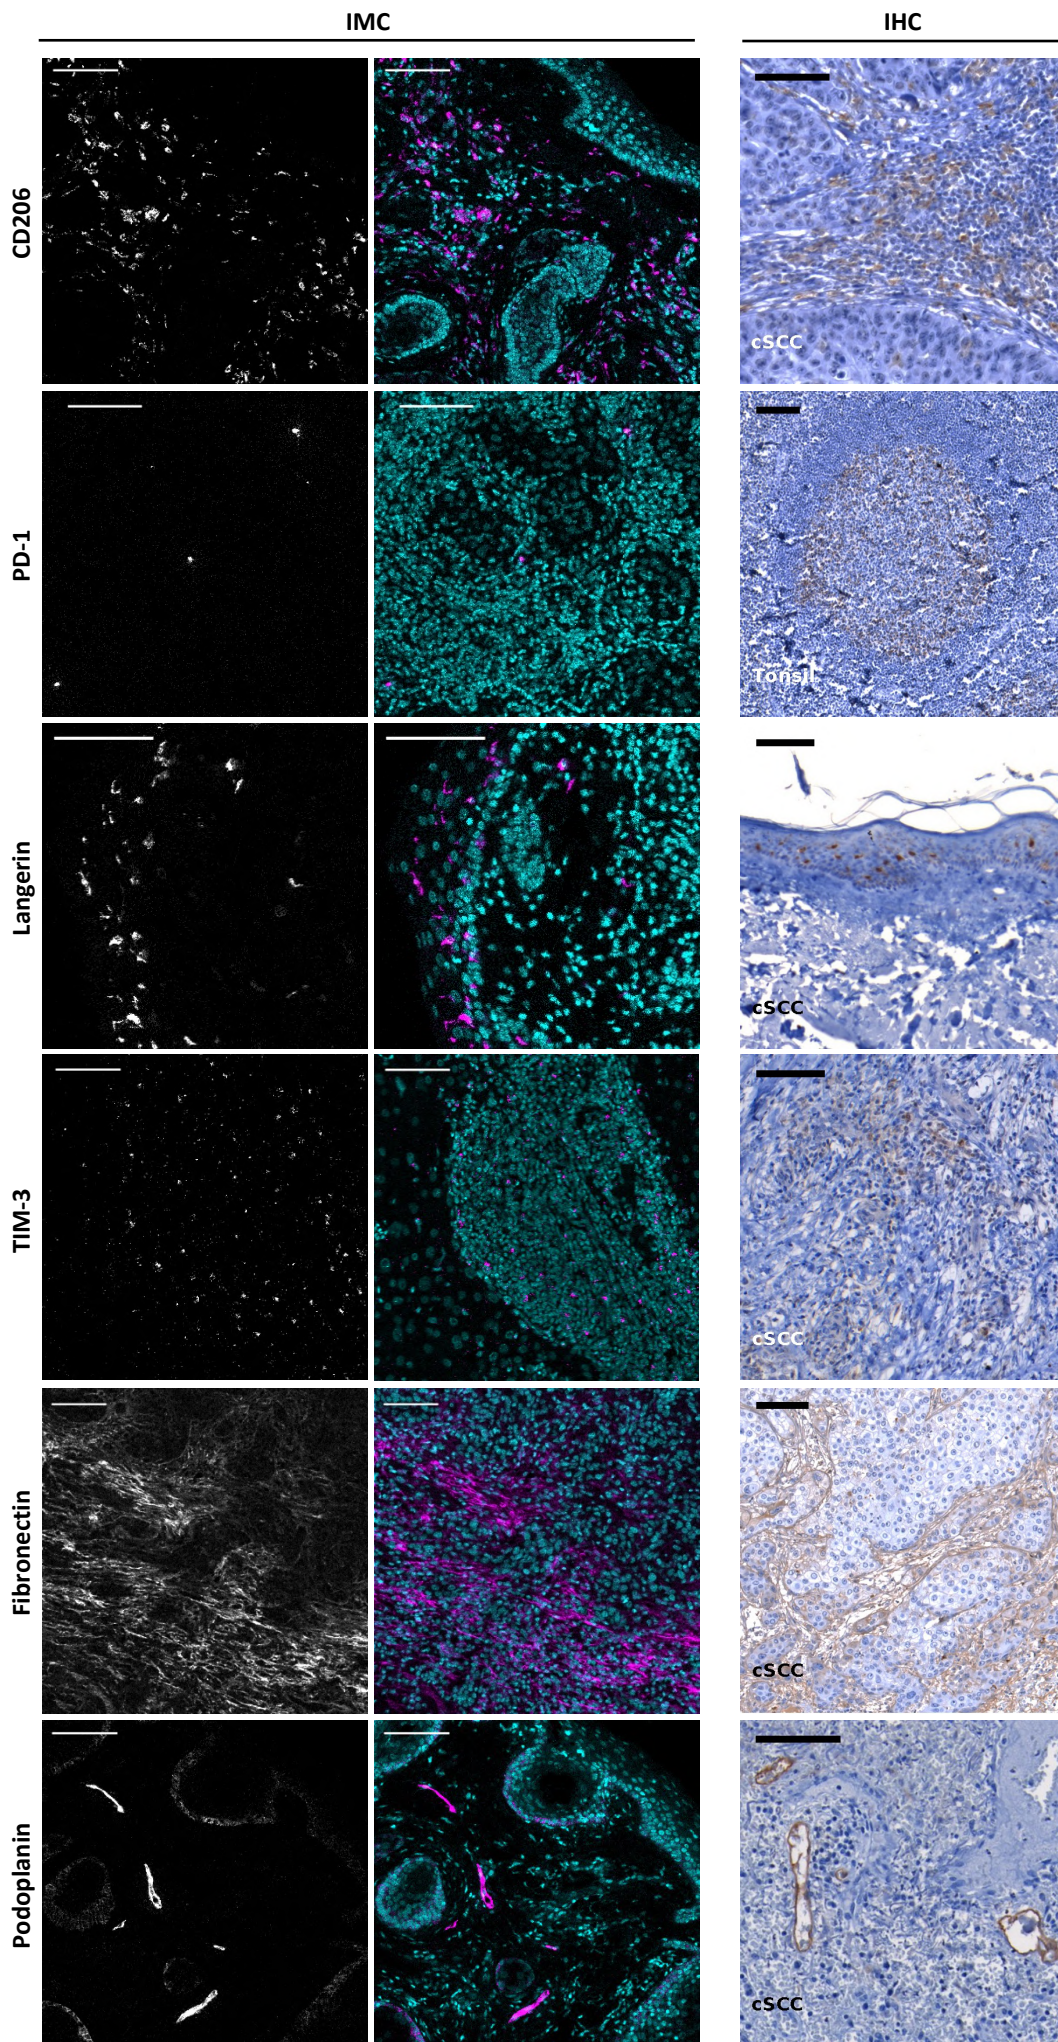

**Supplementary Figure 1-E** : Staining validation of the 39 antibodies used for IMC on cSCC sections and IHC on cSCC or tonsil sections. Single IMC antibody signal (left panels). IMC antibody (magenta) and nuclei (cyan) overlaid signals (middle panels). IHC antibody immunostaining (right panels). Scale bar = 100  $\mu$ m.

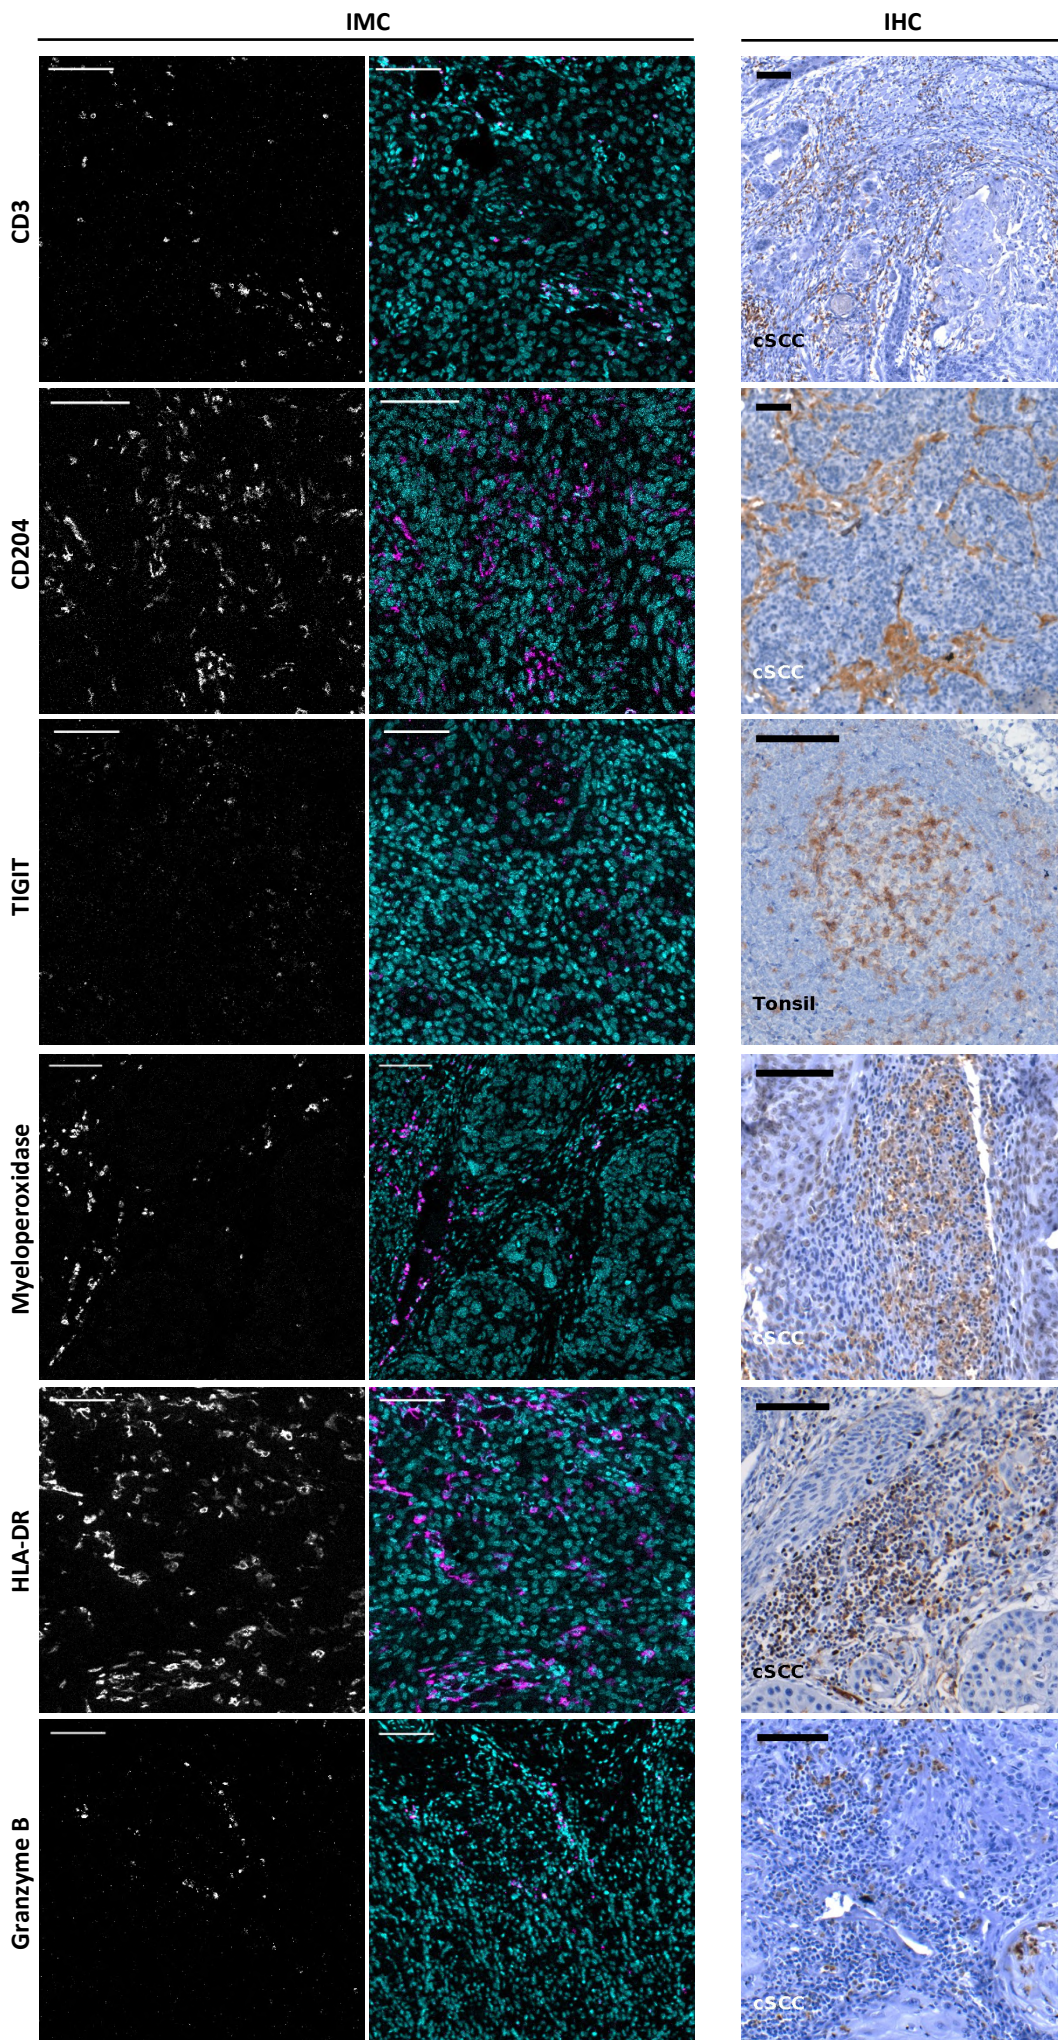

**Supplementary Figure 1-F** : Staining validation of the 39 antibodies used for IMC on cSCC sections and IHC on cSCC or tonsil sections. Single IMC antibody signal (left panels). IMC antibody (magenta) and nuclei (cyan) overlaid signals (middle panels). IHC antibody immunostaining (right panels). Scale bar = 100  $\mu$ m.



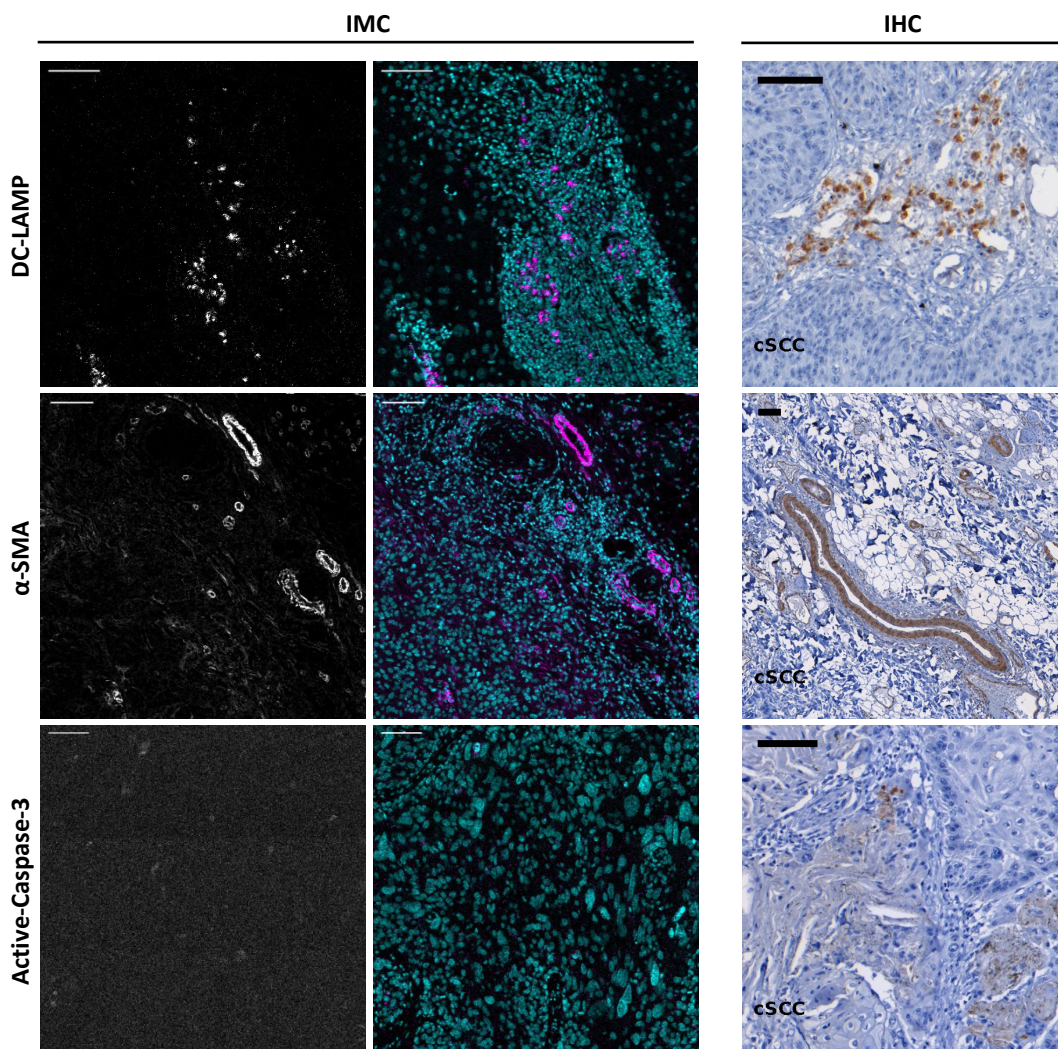

**Supplementary Figure 1-G** : Staining validation of the 39 antibodies used for IMC on cSCC sections and IHC on cSCC or tonsil sections. Single IMC antibody signal (left panels). IMC antibody (magenta) and nuclei (cyan) overlaid signals (middle panels). IHC antibody immunostaining (right panels). Scale bar = 100  $\mu$ m.

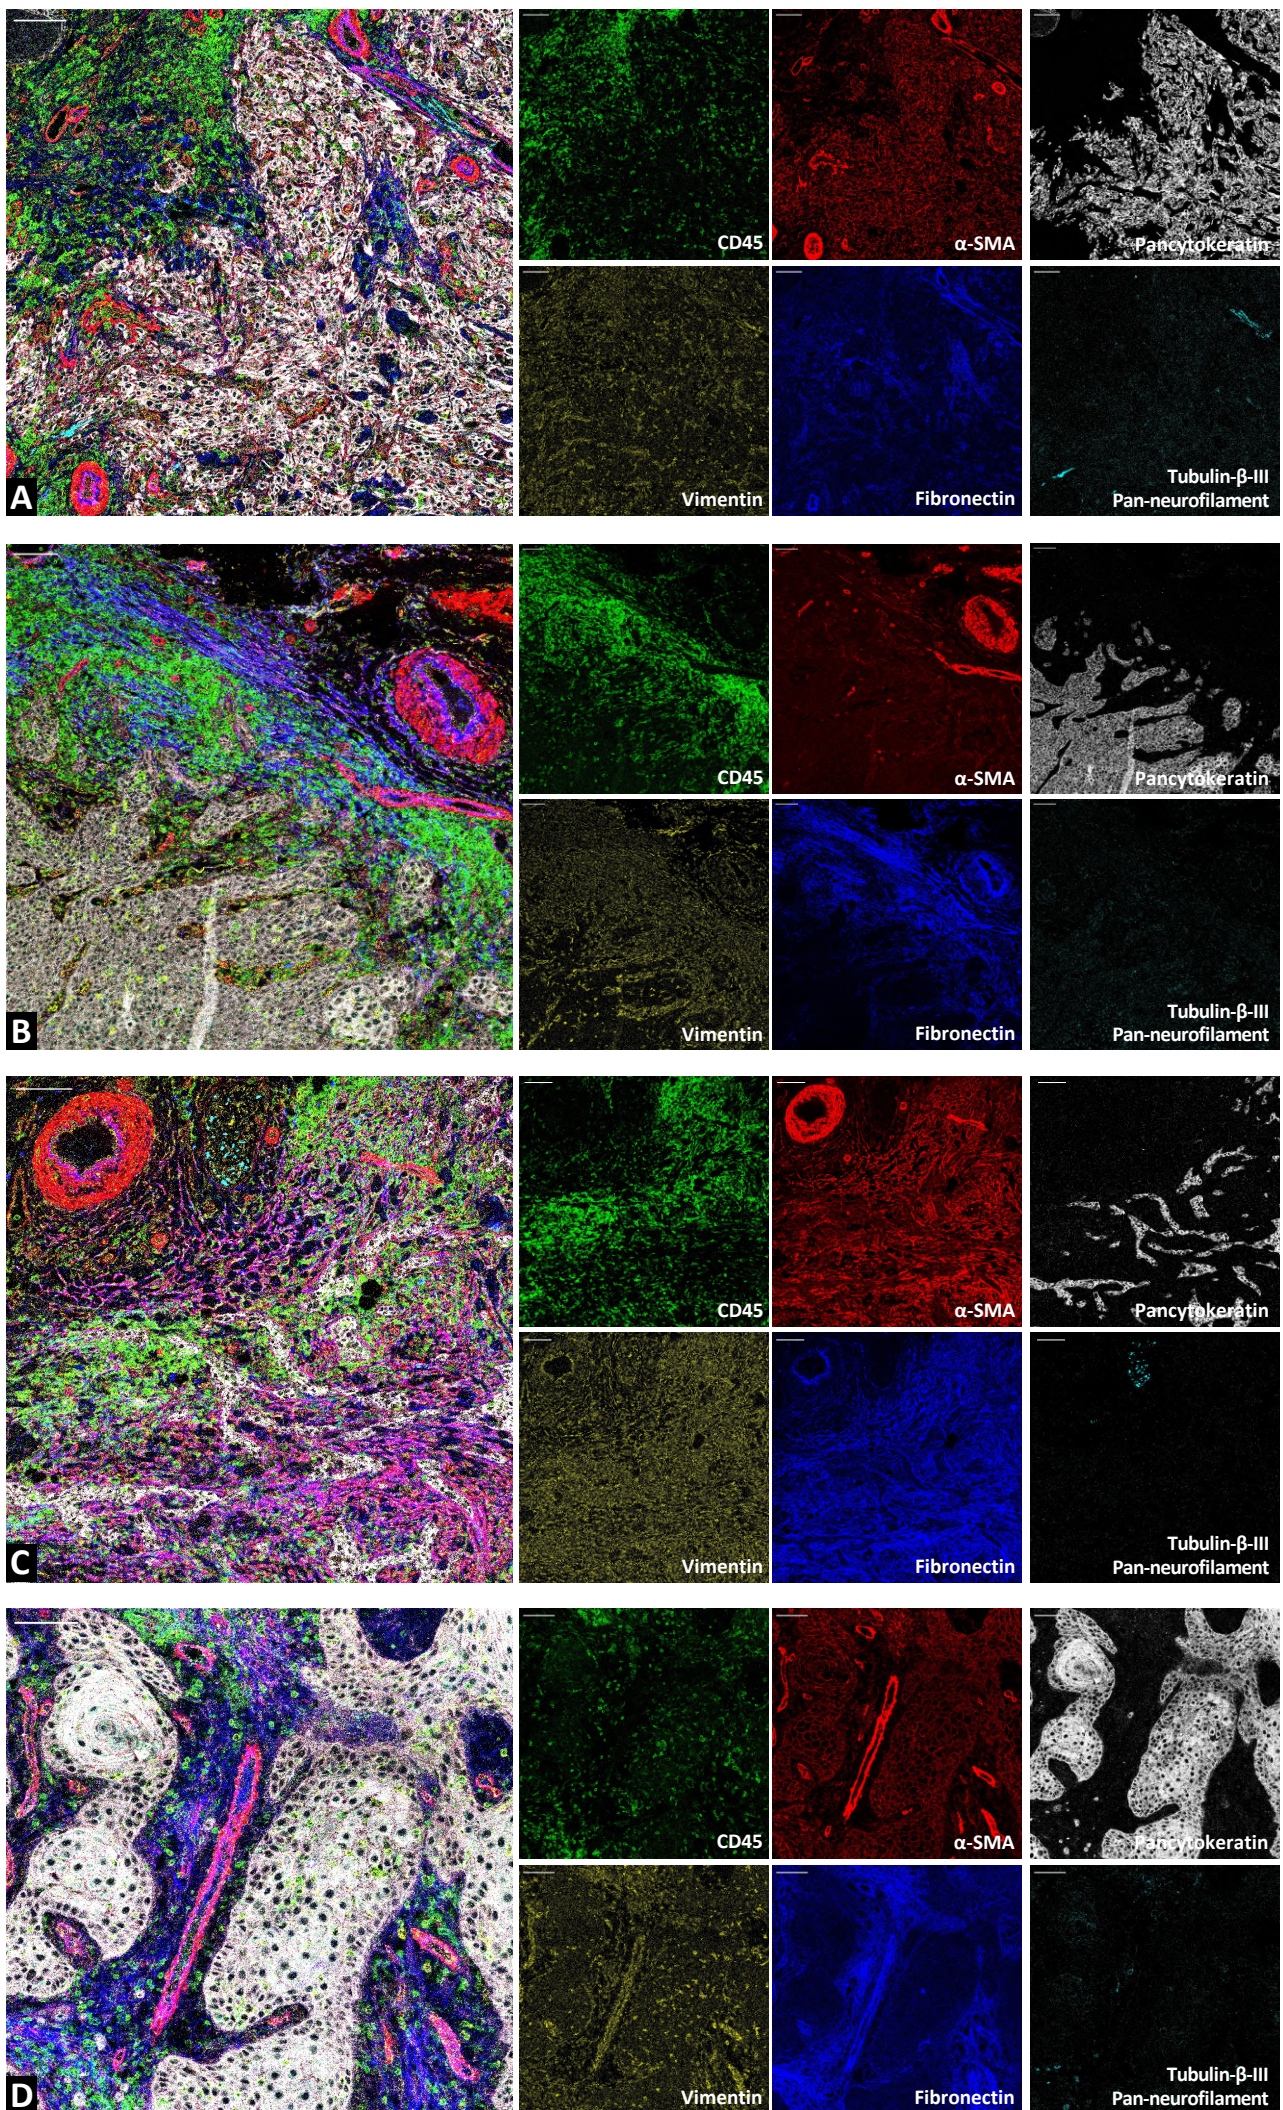

**Supplementary Figure 2:** Visualization by ICM of structural and cellular TiME components in a single region of four cSCC sections. Overlaid and single antibody signals representing immune cells (CD45), blood vessels and CAFs (αSMA), tumor cells (pan-cytokeratin), fibroblasts (vimentin), ECM (fibronectin) nerve fibers (pan-neurofilament and Tubulin-b-III), of the same region of four cSCC sections: cSCC-5 (A), cSCC-6 (B), cSCC-7 (C) and cSCC-8 (D). Scale bar = 100 μm.
